# Supplementary material for: Consistently altered expression of gene sets in postmortem brains of individuals with major psychiatric disorders
Source: PubMed Central journal article supplement (PMC5048210; doi:10.1038/tp.2016.173), 2016-09-13

Figure S2) Distribution of Differential Expression p Values

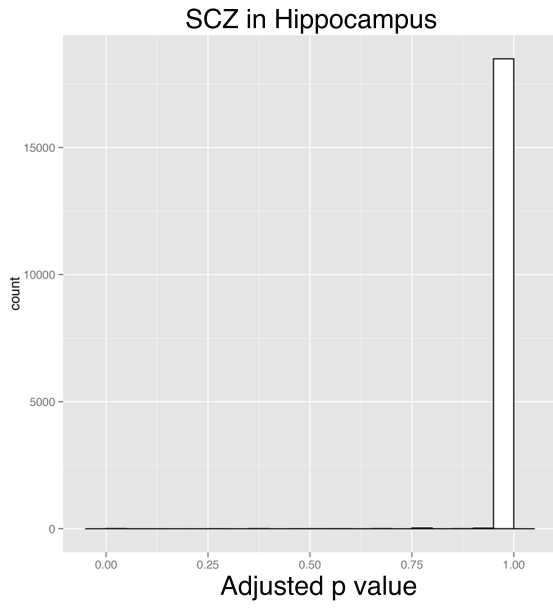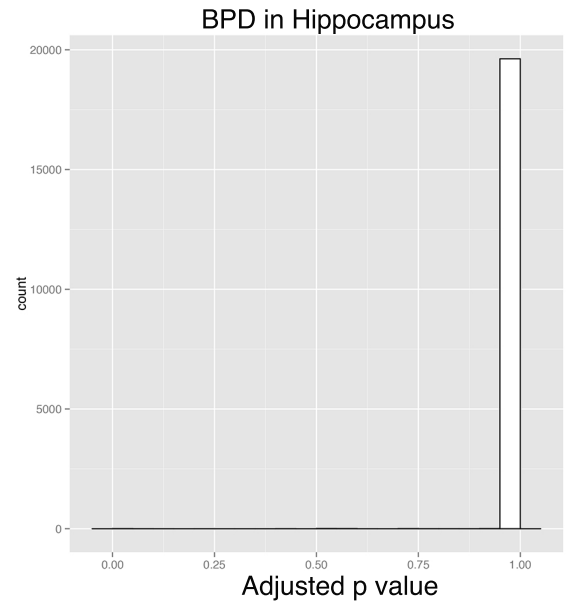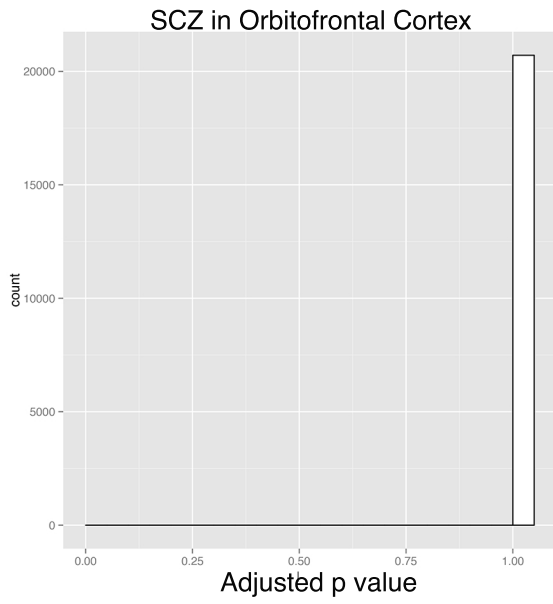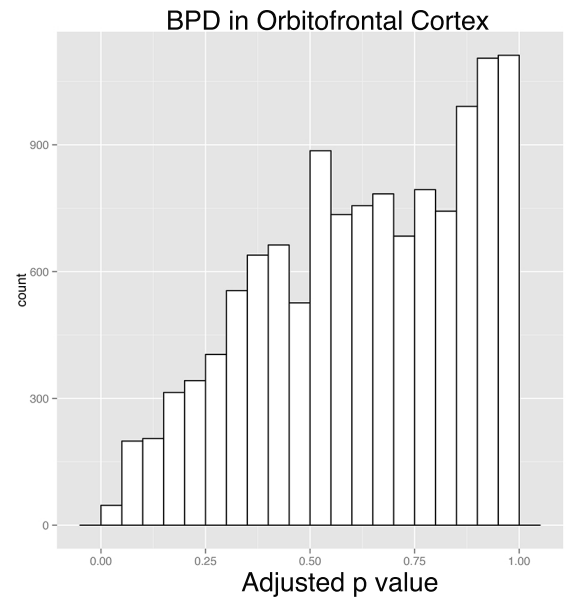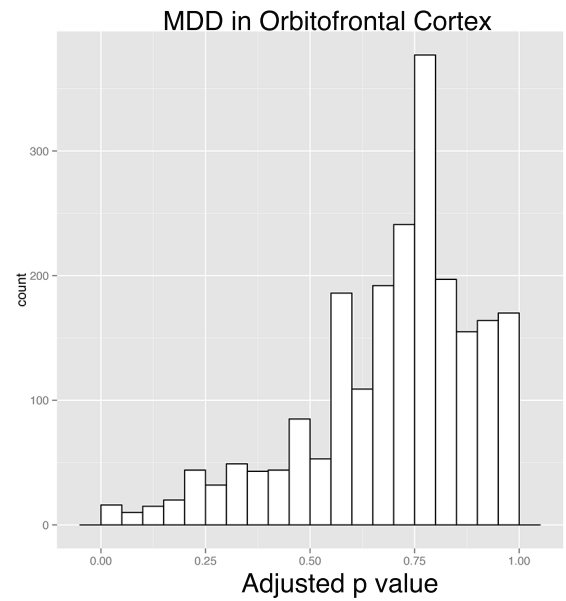

Supplement: tp2016173x5.pdf [file tp2016173x5.pdf]
