# Supplementary material for: Consistently altered expression of gene sets in postmortem brains of individuals with major psychiatric disorders
Source: PubMed Central journal article supplement (PMC5048210; doi:10.1038/tp.2016.173), 2016-09-13
Supplement: tp2016173x11.pdf [file tp2016173x11.pdf]

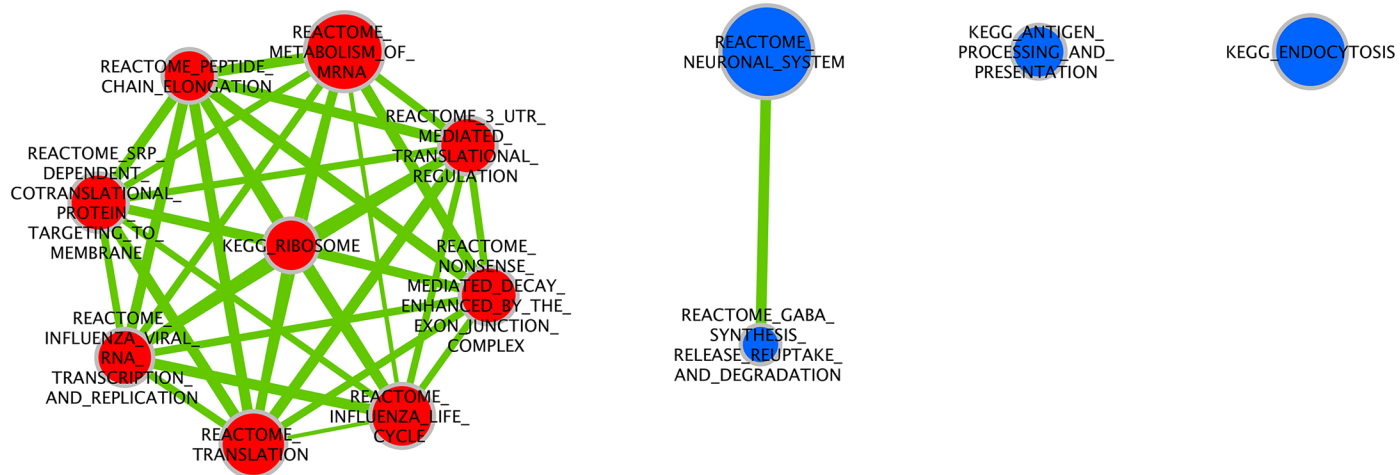

Figure S8) Functional analysis of overlap of gene sets enriched in SCZ, BPD, and MDD in both the hippocampus and the orbitofrontal cortex
